# Supplementary material
Source: PubMed Central journal article supplement (PMC5296272)
Supplement: NIHMS835419-supplement-1.pdf [file NIHMS835419-supplement-1.pdf]

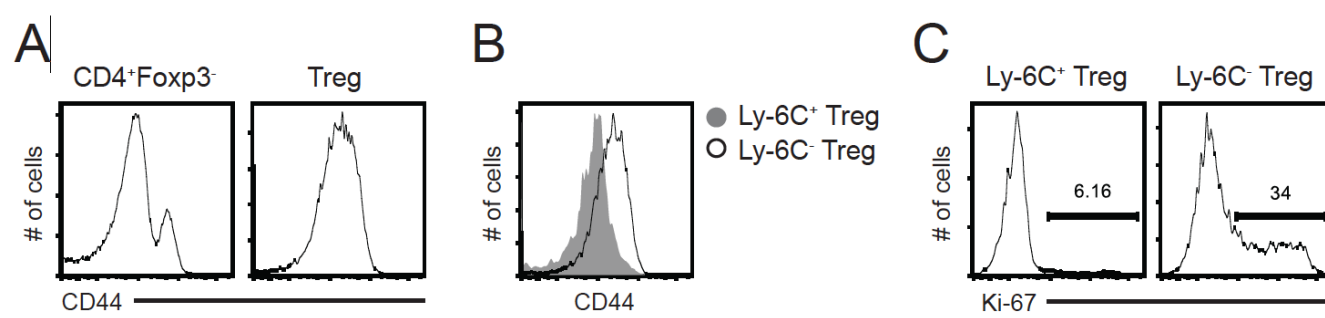

**SUPPLEMENTAL FIGURE 1.** Analysis of CD44 and Ki-67 expression from Ly-6C<sup>+</sup> and Ly-6C<sup>-</sup> Tregs in the steady state. Spleens were harvested from WT C57BL/6 mice. (A) Representative histograms of CD44 expression among CD4<sup>+</sup> T cells (left) or Tregs (right). (B) Overlay of representative histograms of CD44 expression among Ly-6C<sup>+</sup> (filled histogram) and Ly-6C<sup>-</sup> (open histogram) Tregs. (C) Representative histograms of Ki-67 expression among Ly-6C<sup>+</sup> (left) and Ly-6C<sup>-</sup> (right) Tregs. Data are representative of three independent experiments with three - five mice per group per experiment (twelve mice total).

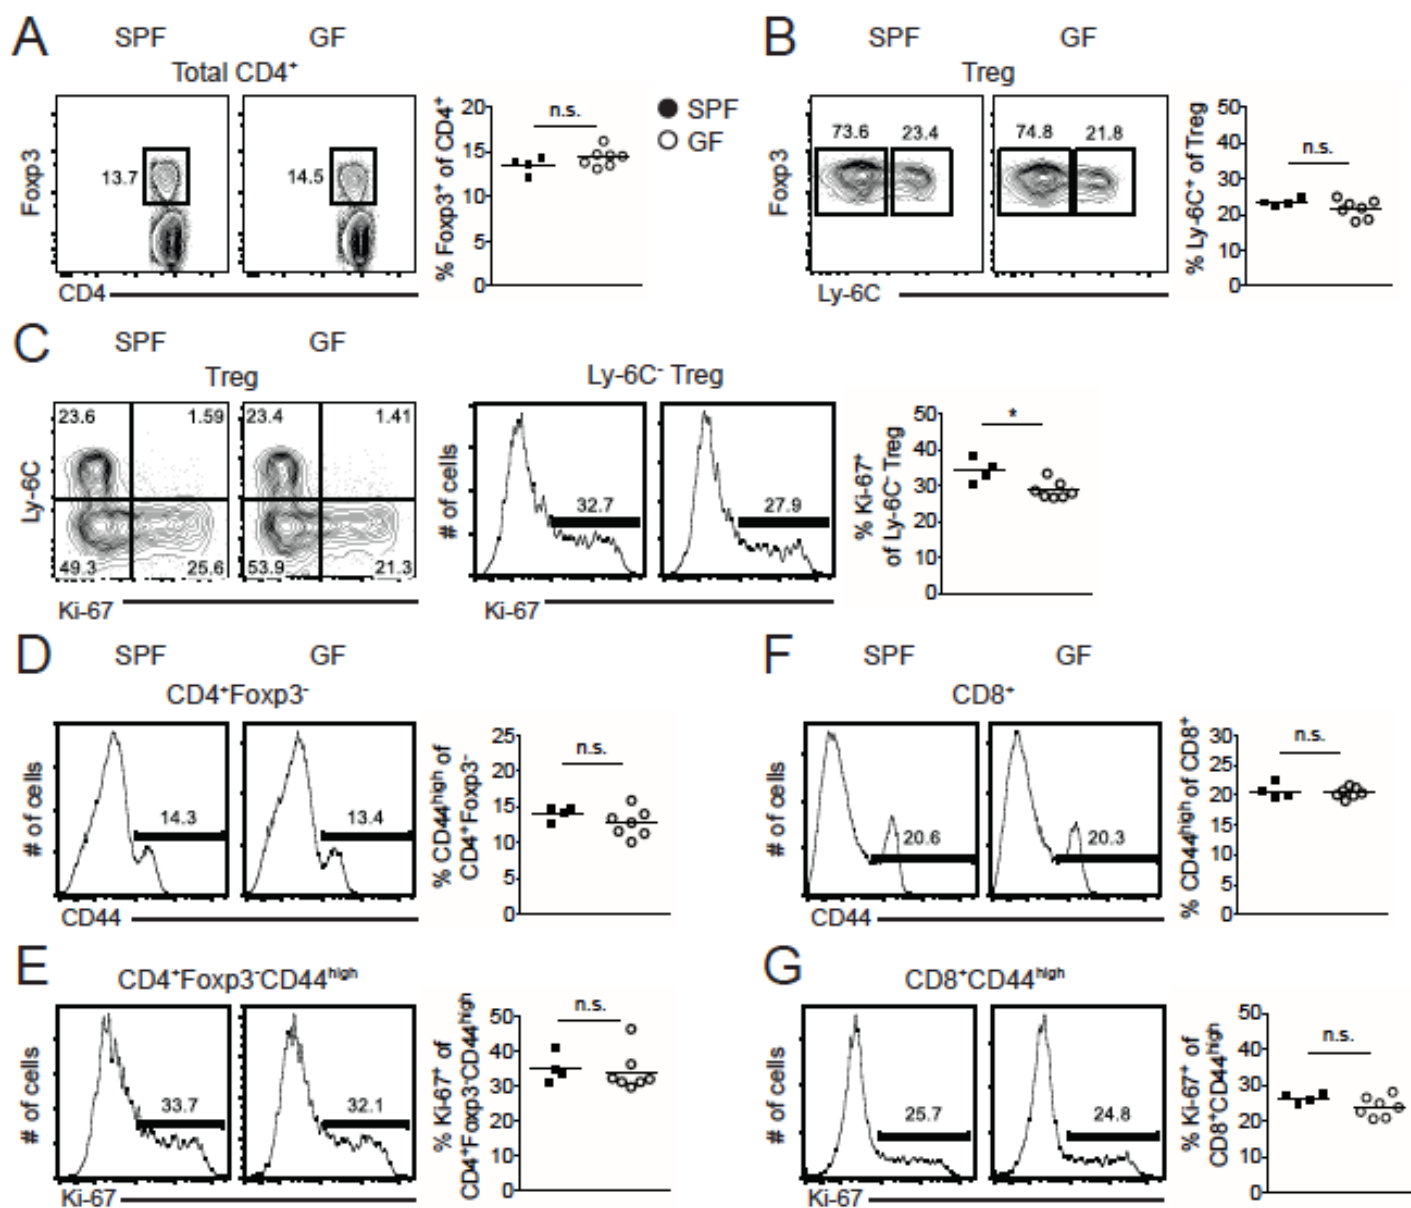

**SUPPLEMENTAL FIGURE 2.** The absence of commensal microbes does not disrupt the frequency nor differential homeostasis of NP and MP T cell subsets. Spleens were harvested from SPF and GF mice in the steady state. **(A)** Representative contour plots of Foxp3 expression among total CD4<sup>+</sup> T cells (left). Pooled frequency of Foxp3<sup>+</sup> cells among total CD4<sup>+</sup> T cells (right). **(B)** Representative contour plots of Ly-6C expression among Tregs (left); pooled frequency of Ly-6C<sup>+</sup> cells among Tregs (right). **(C)** Representative contour plots of Ly-6C versus Ki-67 expression among total Tregs (left). Representative histograms show Ki-67 expression among Ly-6C<sup>-</sup> Tregs; pooled frequency of Ki-67 expression among Ly-6C<sup>-</sup> Tregs (right). Representative histograms (left) and pooled frequency (right) of CD44 expression among CD4<sup>+</sup> T cells **(D)** or CD8<sup>+</sup> T cells **(F)**. Representative histograms (left) and pooled frequency (right) of Ki-67 expression among MP CD4<sup>+</sup> T cells **(E)** or MP CD8<sup>+</sup> T cells **(G)**. Filled circles represent SPF mice; open circles represent GF mice. Each symbol represents an individual mouse from one experiment with four total mice (SPF) and seven total mice (GF). Small horizontal lines indicate the mean. \* $P < 0.05$ , \*\* $P < 0.01$ , \*\*\* $P < 0.001$ , \*\*\*\* $P < 0.0001$  (unpaired Student's  $t$  test).

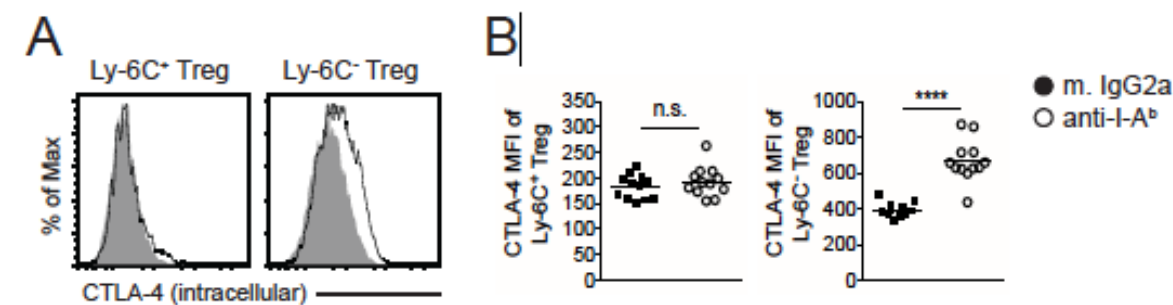

**SUPPLEMENTAL FIGURE 3.** Increase in intracellular CTLA-4 MFI among Ly-6C<sup>-</sup> Tregs following transient and global blockade of MHC Class II. FcR $\gamma$ <sup>-/-</sup> mice were administered anti-I-A<sup>b</sup> mAb (or mouse IgG2a) on d 0, 2, and 3 and spleens harvested on d 6. **(A)** Representative histograms of intracellular CTLA-4 expression among Ly-6C<sup>-</sup> and Ly-6C<sup>+</sup> Tregs. **(B)** Pooled frequency of CTLA-4 MFI among Ly-6C<sup>-</sup> and Ly-6C<sup>+</sup> Tregs. Filled circles represent mouse IgG2a treatment; open circles represent anti-I-A<sup>b</sup> mAb treatment. Each symbol represents an individual mouse from five independent experiments with two - five mice per group (twelve mice total). Small horizontal lines indicate the mean. \* $P < 0.05$ , \*\* $P < 0.01$ , \*\*\* $P < 0.001$ , \*\*\*\* $P < 0.0001$  (unpaired Student's  $t$  test).

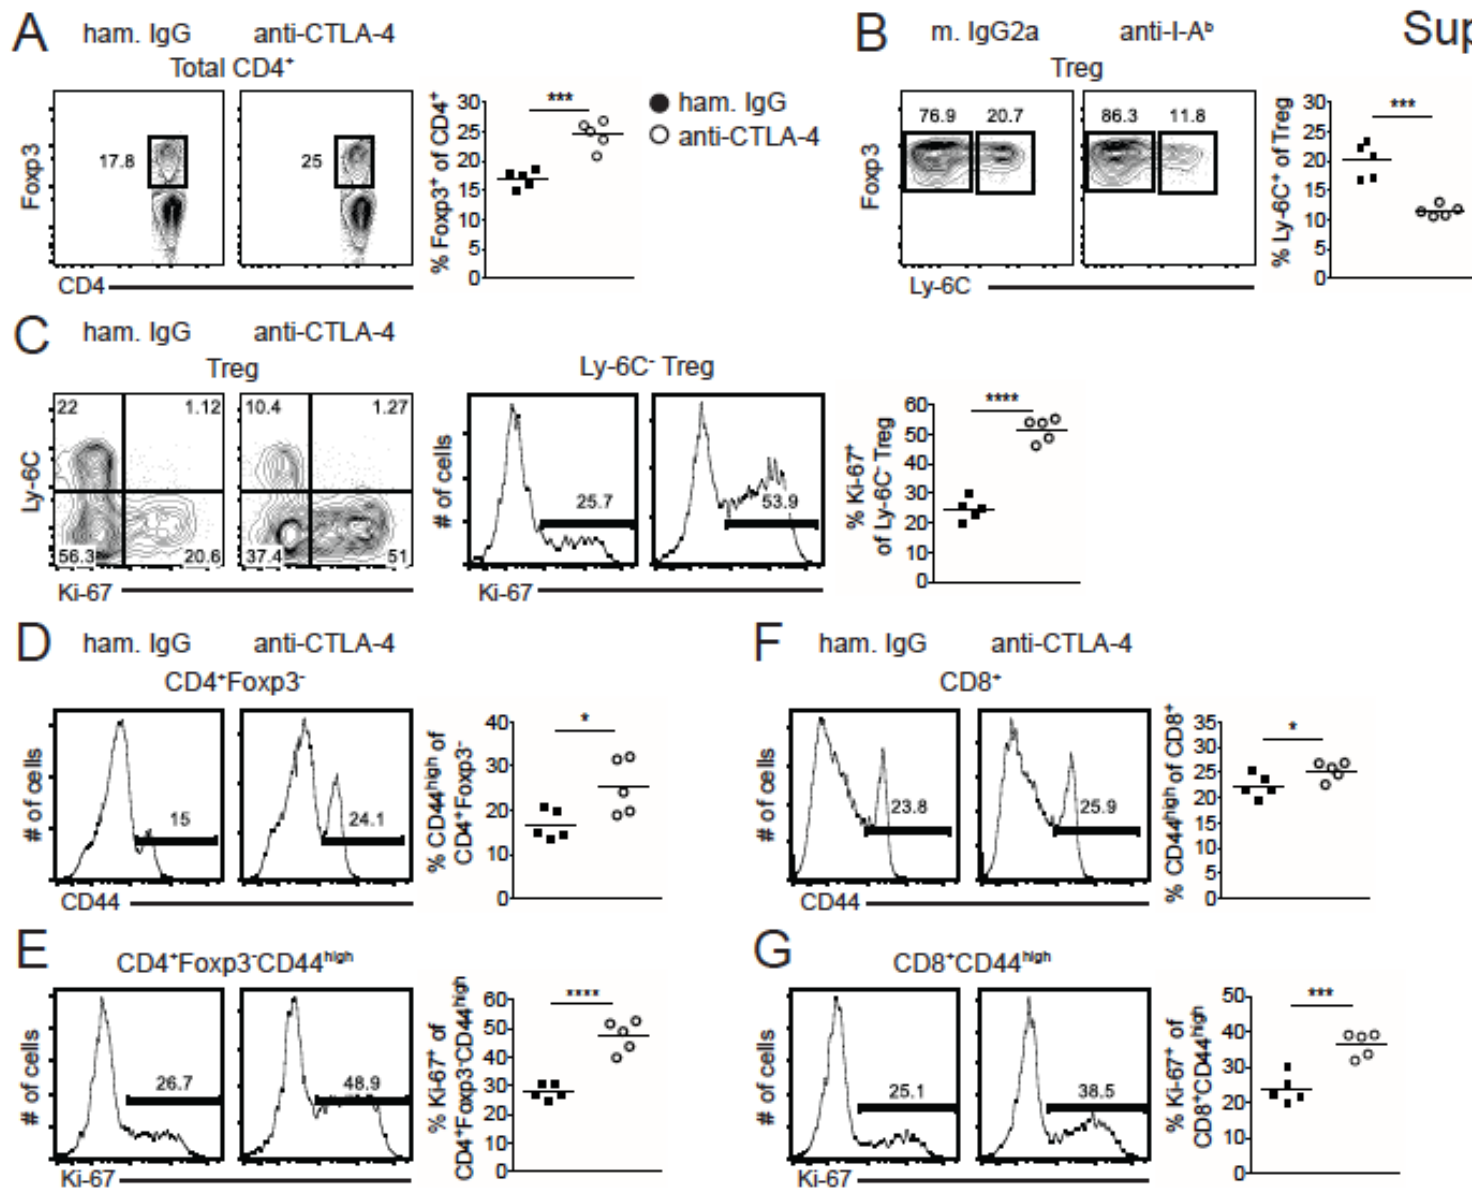

**SUPPLEMENTAL FIGURE 4.** The increased frequency and proliferation of Ly-6C<sup>-</sup> Tregs following CTLA-4 blockade is not influenced by antibody-mediated deletion of T cells. FcR $\gamma$ <sup>-/-</sup> mice were administered anti-CTLA-4 mAb (or hamster IgG) on d 0, 2, 4, and 6 and spleens harvested on d 8. (A) Representative contour plots of Foxp3 expression among total CD4<sup>+</sup> T cells (left). Pooled frequency of Foxp3<sup>+</sup> cells among total CD4<sup>+</sup> T cells (right). (B) Representative contour plots of Ly-6C expression among Tregs (left); pooled frequency of Ly-6C<sup>+</sup> cells among Tregs (right). (C) Representative contour plots of Ly-6C versus Ki-67 expression among total Tregs (left). Representative histograms show Ki-67 expression among Ly-6C<sup>-</sup> Tregs; pooled frequency of Ki-67 expression among Ly-6C<sup>-</sup> Tregs (right). Representative histograms (left) and pooled frequency (right) of CD44 expression among CD4<sup>+</sup> T cells (D) or CD8<sup>+</sup> T cells (F). Representative histograms (left) and pooled frequency (right) of Ki-67 expression among MP CD4<sup>+</sup> T cells (E) or MP CD8<sup>+</sup> T cells (G). Filled circles represent hamster IgG treatment; open circles represent anti-CTLA-4 mAb treatment. Each symbol represents an individual mouse from two independent experiments with two or three mice per group (five mice total). Small horizontal lines indicate the mean. \**P* < 0.05, \*\**P* < 0.01, \*\*\**P* < 0.001, \*\*\*\**P* < 0.0001 (unpaired Student's *t* test).
